# Supplementary material
Source: PubMed Central journal article supplement (PMC3773825)

# Supplemental Figure 1

A

Line 1: LAP-tTA

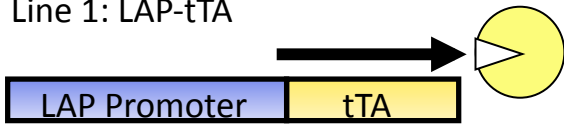

Line 2: TRE-PGC-1

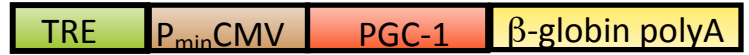

Mate 2 lines of mice  
LAPtTA x TRE-PGC-1

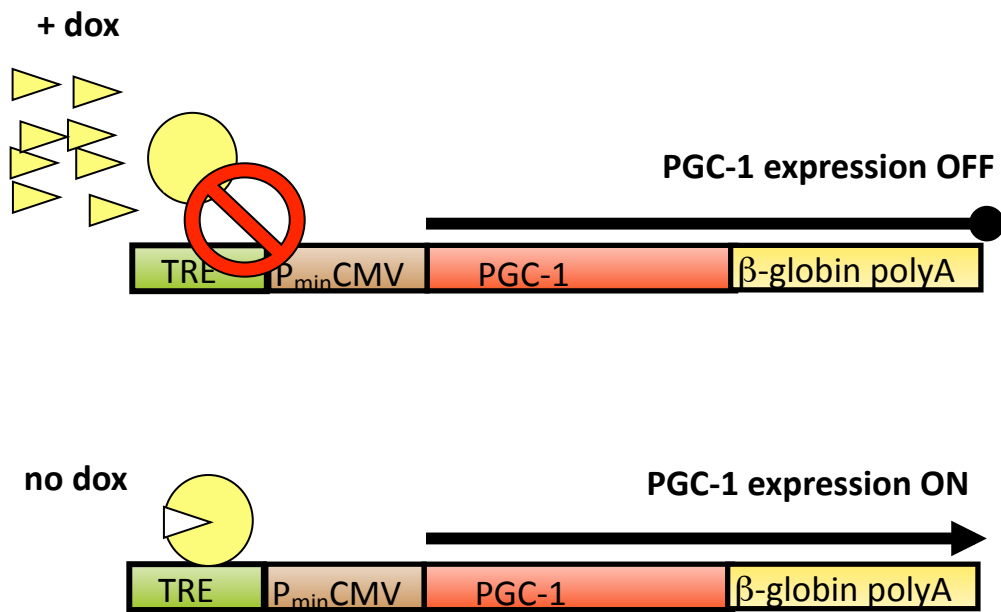

B

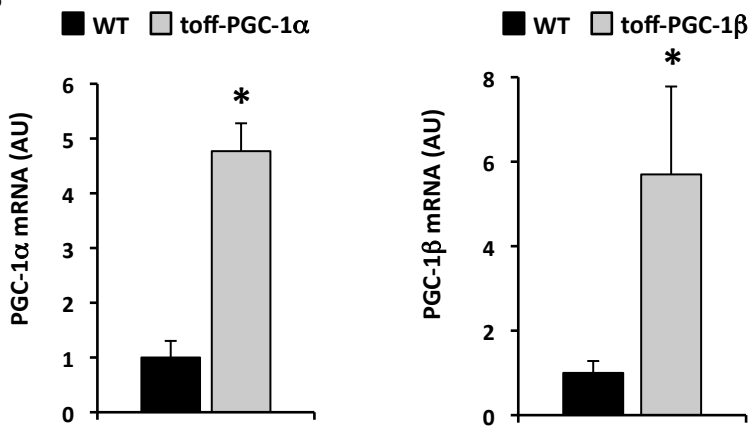

Supplemental Figure 2

A

|                            | Glucose      | TAG          | FFA       | Cholesterol  |
|----------------------------|--------------|--------------|-----------|--------------|
| WT                         | 181.1 ± 3.5  | 111.3 ± 9.1  | 0.6 ± 0.1 | 171.4 ± 7.4  |
| LAP-tet-OFF PGC-1 $\alpha$ | 215.3 ± 14.0 | 127.3 ± 16.4 | 0.7 ± 0.1 | 124.0 ± 16.6 |
| LAP-tet-OFF-PGC-1 $\beta$  | 173.8 ± 5.3  | 125 ± 17.3   | 0.8 ± 0.1 | 224.9 ± 2.6  |

B

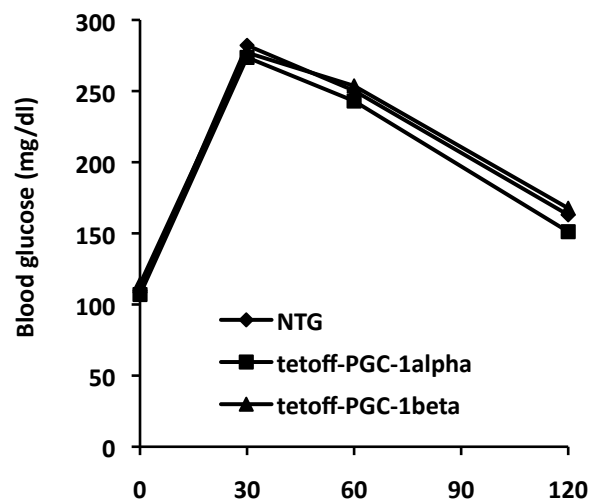

C

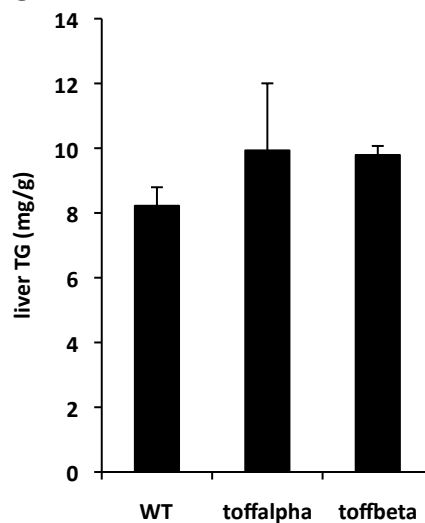

Supplement: mmc1.pdf [file mmc1.pdf]
